# Supplementary material for: XBP-1u suppresses autophagy by promoting the degradation of FoxO1 in cancer cells
Source: PubMed Central journal article supplement — Cell Res. 2013 Jan 1;23(4):491–507. doi: 10.1038/cr.2013.2 (PMC3616429; doi:10.1038/cr.2013.2), 2013-01-01
Supplement: cr20132x1.pdf [file cr20132x1.pdf]

## Supplementary information, Figure S1

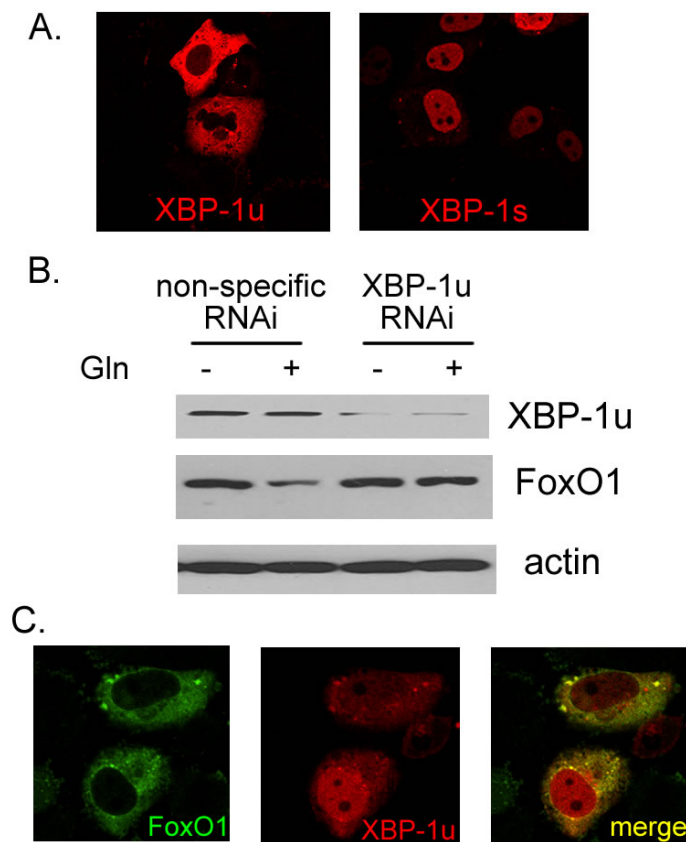

**Figure S1** Localization of XBP-1u and XBP-1s. **(A)** Flag-tagged XBP-1u or XBP-1s was individually transfected into HCT116 cells, and cellular localization of XBP-1u and XBP-1s was observed using a confocal microscope. **(B)** Another XBP-1 RNAi oligo or a non-specific RNAi was designed and transfected into HCT116 cells. 48 h after transfection, HCT116 cells were glutamine starved for up to 48 h, and cell lysates were extracted for quantification of XBP-1u or FoxO1 levels. **(C)** H1299 cells were co-transfected with plasmids encoding GFP-FoxO1 and Flag-XBP-1u, and immunofluorescence was performed after staining with an anti-Flag antibody.
