# Supplementary material for: XBP-1u suppresses autophagy by promoting the degradation of FoxO1 in cancer cells
Source: PubMed Central journal article supplement — Cell Res. 2013 Jan 1;23(4):491–507. doi: 10.1038/cr.2013.2 (PMC3616429; doi:10.1038/cr.2013.2), 2013-01-01
Supplement: cr20132x2.pdf [file cr20132x2.pdf]

**Supplementary information, Figure S2**

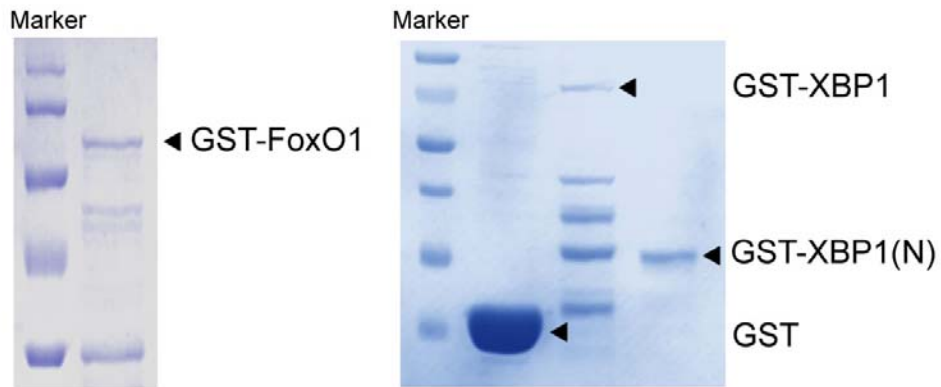

**Figure S2** Coomassie blue staining of GST and GST fusion proteins.
