# Supplementary material for: XBP-1u suppresses autophagy by promoting the degradation of FoxO1 in cancer cells
Source: PubMed Central journal article supplement — Cell Res. 2013 Jan 1;23(4):491–507. doi: 10.1038/cr.2013.2 (PMC3616429; doi:10.1038/cr.2013.2), 2013-01-01
Supplement: cr20132x8.pdf [file cr20132x8.pdf]

## Supplementary information, Figure S8

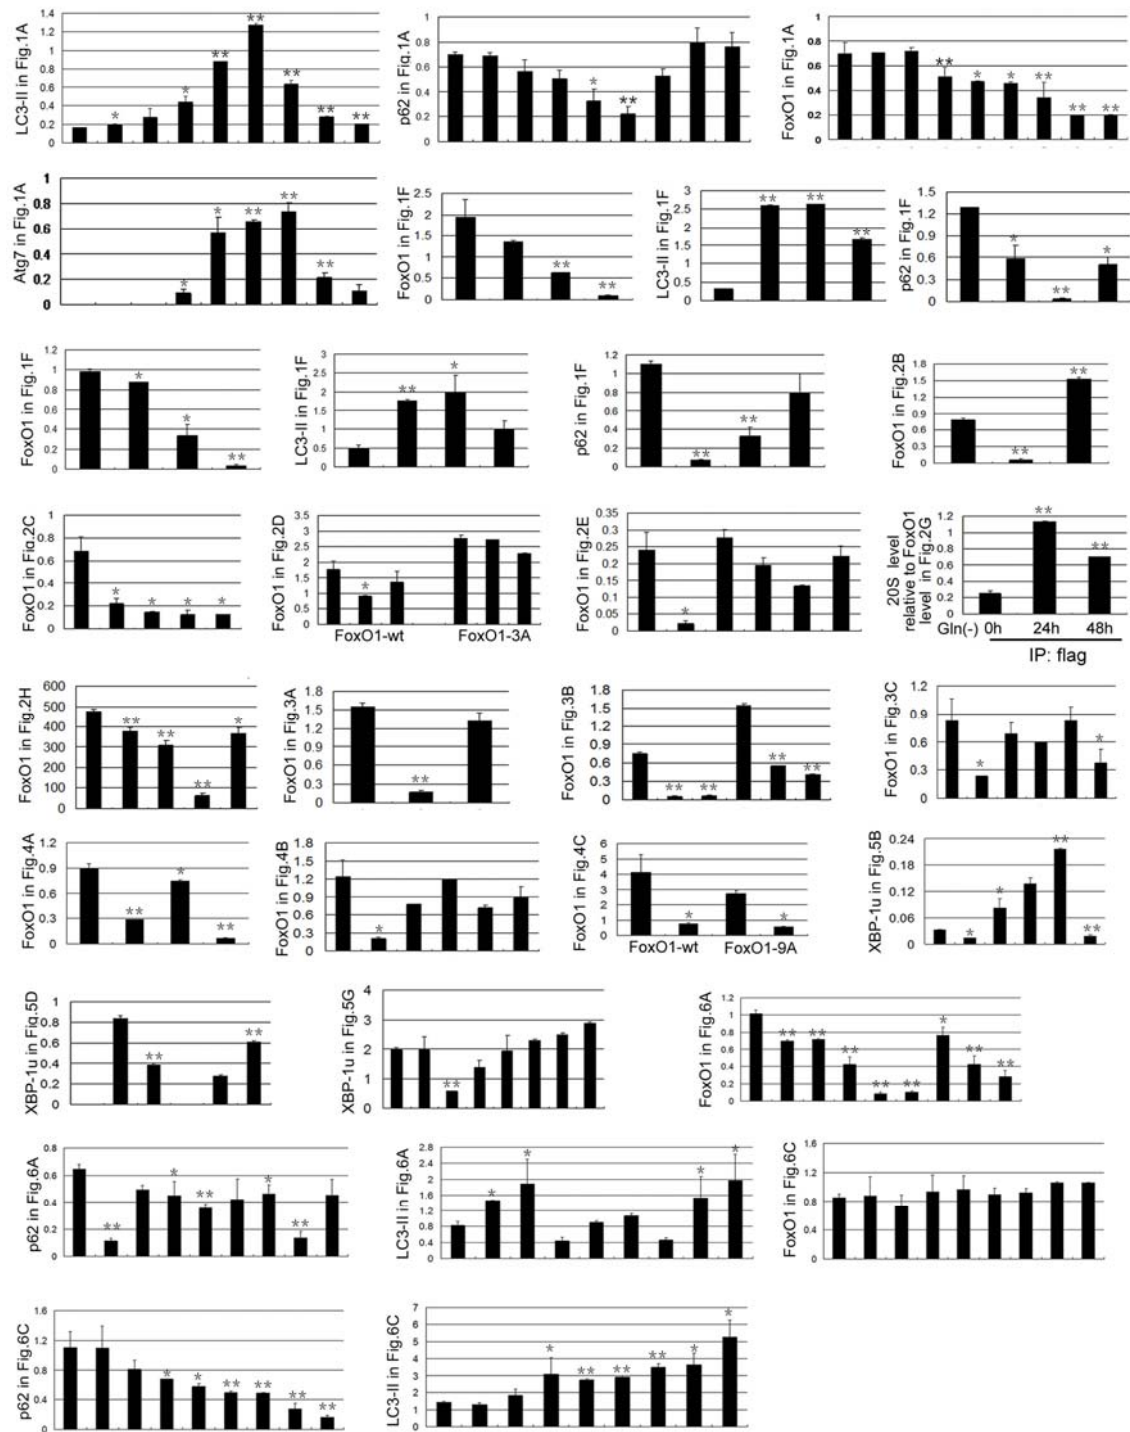

**Figure S8** Statistical analysis of western blot data. All data are at least originated from three independent experiments. \* $P < 0.05$ ; \*\* $P < 0.01$ .
